# Supplementary material
Source: PubMed Central journal article supplement (PMC9328942)
Supplement: NIHMS1690340-supplement-Supplementary_Table_1_and_Supplementary_Figures_1-7.pdf [file NIHMS1690340-supplement-Supplementary_Table_1_and_Supplementary_Figures_1-7.pdf]

Supplementary Table 1. Running time in minutes of TRUST4, MiXCR, TRUST3 and CATT on tumor RNA-seq samples

TRUST4's running time has two entries for BAM input and FASTQ input respectively. The numbers in the parenthesis were the running time on processing input FASTQ files. BAM files were generated by STAR and took 2.5 hours on average. The performance was tested with 8 threads, and the running times were displayed for both wall time (in bold) and cpu time.

TRUST3 was not optimized for parallelization so wall time equals CPU time; CATT used more than 8 threads even when 8 thread was specified as the parameter. TRUST4 and MiXCR consumed less than 6GB memory, and CATT used 8GB memory on average, whereas TRUST3 required 62GB memory on average.

|                 |             | FZ-20                        | FZ-83                      | FZ-94                      | FZ-97                      | FZ-116                     | FZ-122                     | Avg                        |
|-----------------|-------------|------------------------------|----------------------------|----------------------------|----------------------------|----------------------------|----------------------------|----------------------------|
| Read pairs      |             | 126M                         | 107M                       | 85M                        | 93M                        | 86M                        | 125M                       | 104M                       |
| TRUST4<br>BAM   | <b>Wall</b> | <b>44</b>                    | <b>64</b>                  | <b>46</b>                  | <b>35</b>                  | <b>28</b>                  | <b>25</b>                  | <b>40</b>                  |
|                 | CPU         | 103                          | 166                        | 110                        | 86                         | 69                         | 57                         | 98                         |
| TRUST4<br>FASTQ | <b>Wall</b> | <b>56</b><br><b>(25)</b>     | <b>71</b><br><b>(26)</b>   | <b>49</b><br><b>(20)</b>   | <b>40</b><br><b>(20)</b>   | <b>36</b><br><b>(19)</b>   | <b>40</b><br><b>(27)</b>   | <b>49</b><br><b>(23)</b>   |
|                 | CPU         | 202                          | 268                        | 181                        | 155                        | 143                        | 169                        | 186                        |
| MiXCR           | <b>Wall</b> | <b>227</b><br><b>(213)</b>   | <b>235</b><br><b>(212)</b> | <b>175</b><br><b>(131)</b> | <b>181</b><br><b>(156)</b> | <b>149</b><br><b>(139)</b> | <b>240</b><br><b>(188)</b> | <b>201</b><br><b>(173)</b> |
|                 | CPU         | 1726                         | 1810                       | 1353                       | 1404                       | 1188                       | 1893                       | 1562                       |
| TRUST3          | <b>Wall</b> | <b>790</b>                   | <b>717</b>                 | <b>499</b>                 | <b>507</b>                 | <b>409</b>                 | <b>481</b>                 | <b>567</b>                 |
| CATT            | <b>Wall</b> | <b>1057</b><br><b>(1014)</b> | <b>834</b><br><b>(798)</b> | <b>636</b><br><b>(605)</b> | <b>675</b><br><b>(643)</b> | <b>624</b><br><b>(598)</b> | <b>893</b><br><b>(852)</b> | <b>787</b><br><b>(751)</b> |
|                 | CPU         | 8520                         | 6892                       | 5243                       | 5545                       | 5146                       | 7346                       | 6449                       |

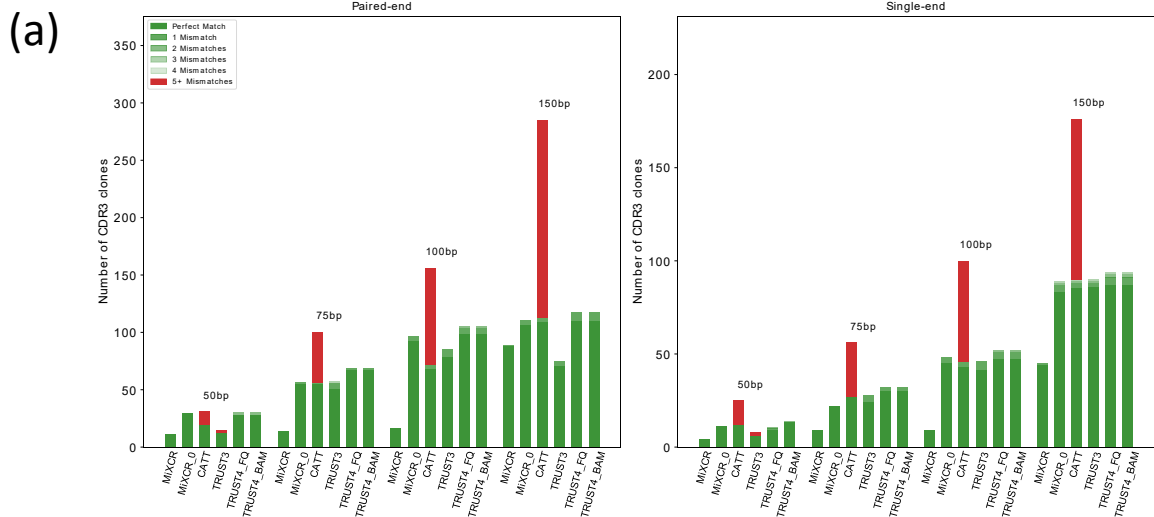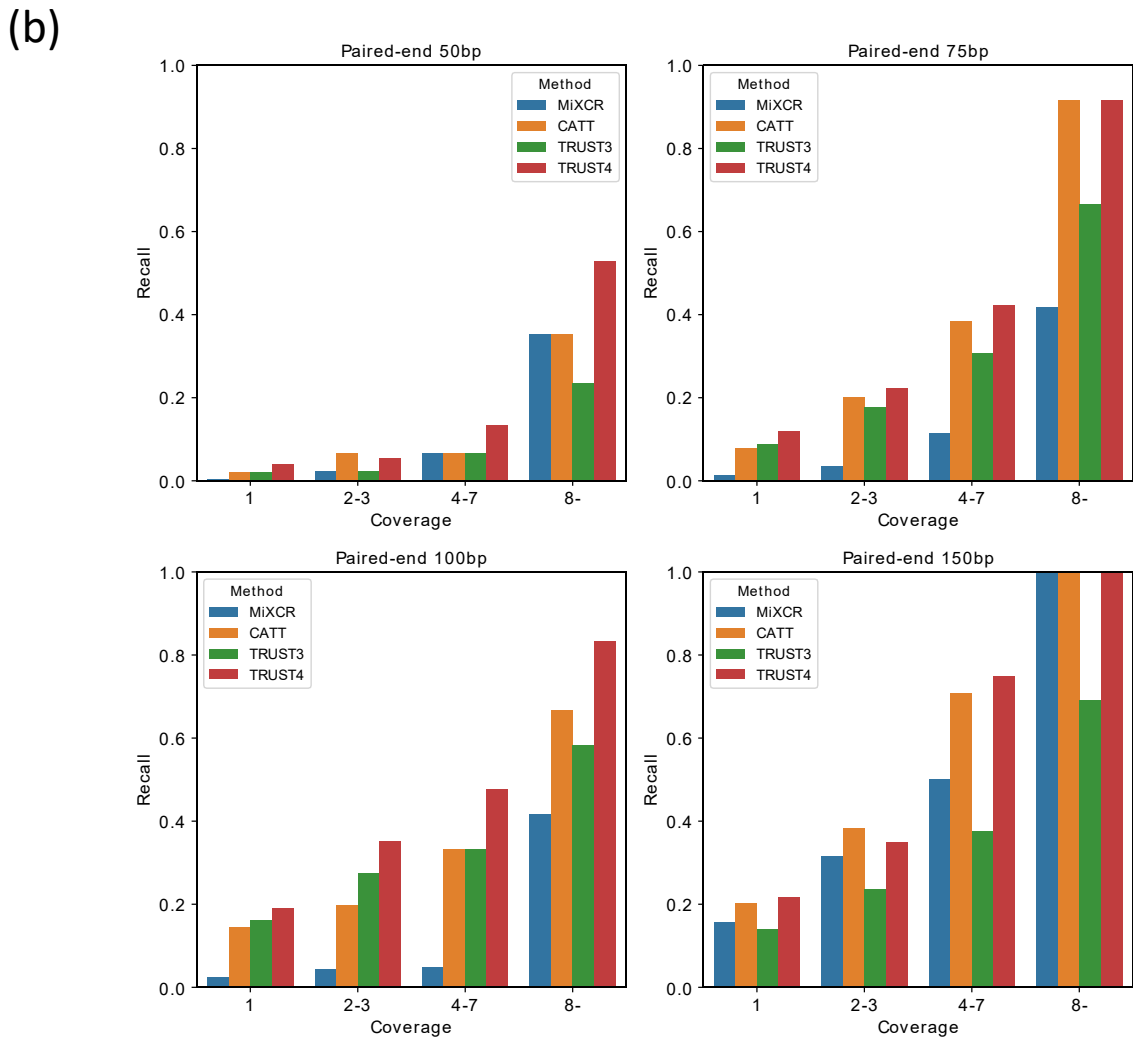

Supplementary Figure 1. Evaluation on the *in silico* RNA-seq data for TRB performance  
 (a) The number of recalled TRB CDR3 from the *in silico* RNA-seq data. with MiXCR, CATT, TRUST3 and TRUST4, including MiXCR with or without filter (MiXCR\_0), and TRUST4 with FASTQ or BAM input.  
 (b) The sensitivity of TRB CDR3 categorized by the number of reads covering the TRB chain.

(a)

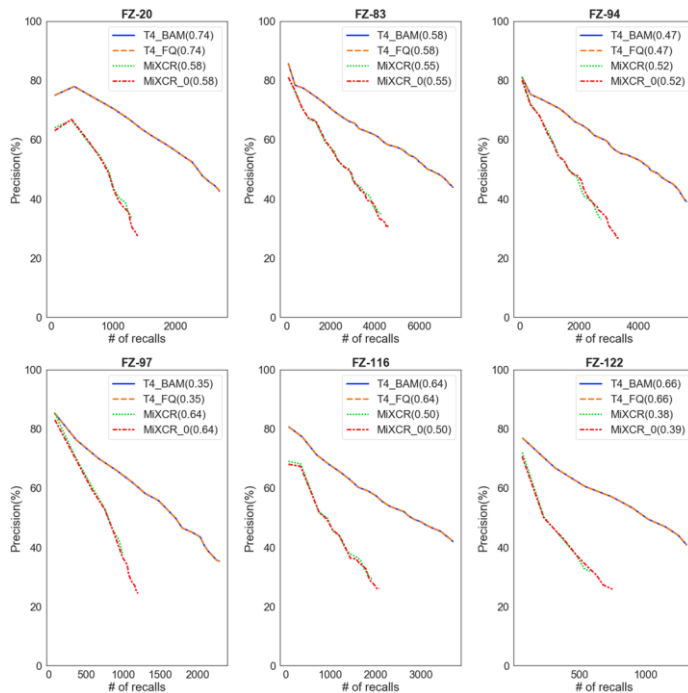

(b)

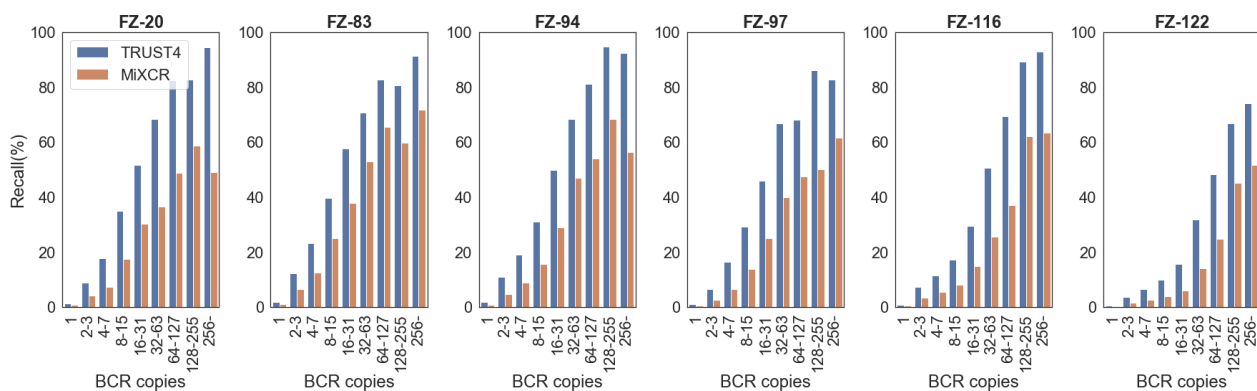

(c)

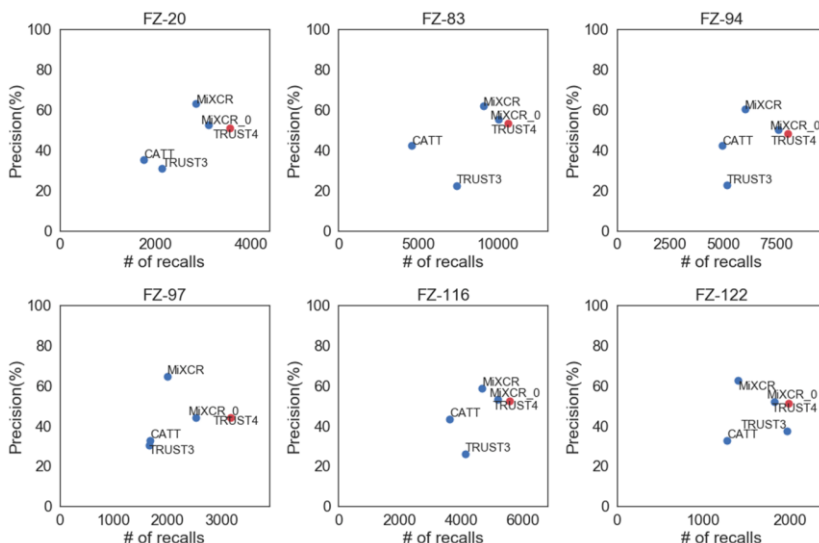

Supplementary Figure 2. Evaluation on the 6 tumor RNA-seq samples using BCR-seq data as the gold standard

(a) Precision-recall curve of IGH assemblies (V, J, C gene assignments and CDR3 sequence). The evaluation included MiXCR, MiXCR\_0, TRUST4 with FASTQ and BAM. The curves were drawn by connecting the precision and recall of the top N abundant assemblies (N=100, 500, 1000,...). Numbers in the legend is the Pearson correlation of the IGH abundance between MiXCR/TRUST4 and BCR-seq. T4 is for TRUST4.

(b) The sensitivity of MiXCR and TRUST4 for IGH assemblies (V, J, C gene assignments and CDR3 sequence) in bulk RNA-seq data on different IGH abundances reported in BCR-seq data

(c) The precision and sensitivity on IGH CDR3 sequence assemblies. Red dots were TRUST4 results.



(a)

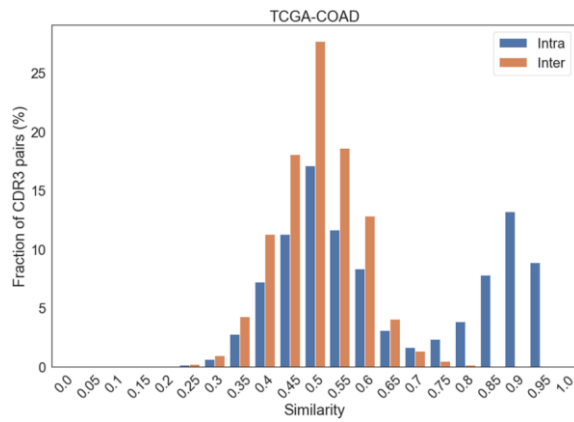

(b)

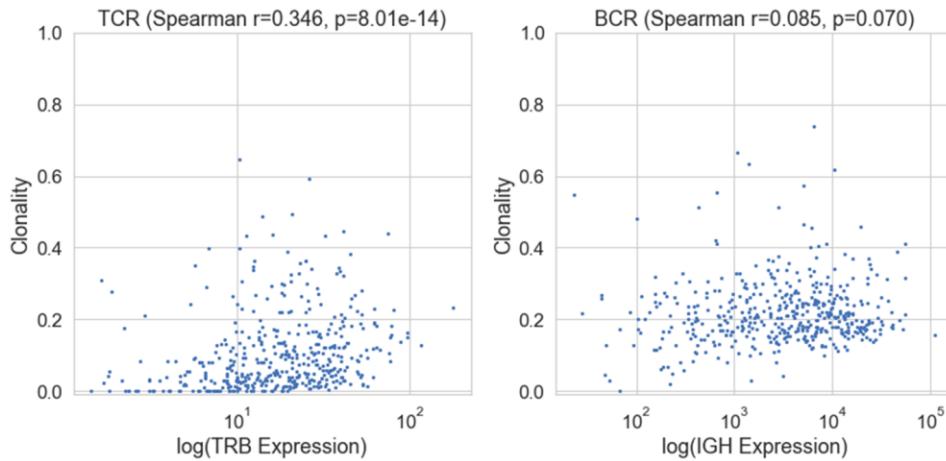

(c)

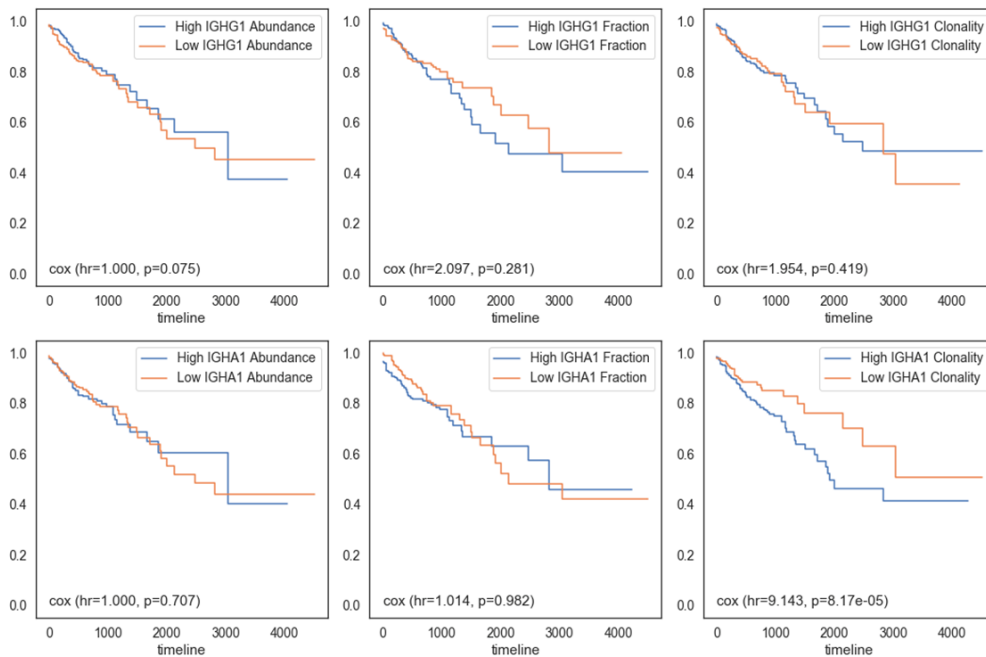

Supplementary Figure 4. Application of TRUST4 on 466 TCGA-COAD RNA-seq samples

(a) The nucleotide similarity distributions of CDR3s pairs with the same length and same V, J gene assignments. The distributions were based on the pairs between samples (inter-patient) and the pairs within the same sample (intra-patient).

(b) Spearman correlation between TRB (left) and IGH (right) gene expression (sum of constant genes' TPMs) and clonality. TRB clonality was based on CDR3 sequences and IGH clonality was based on IGH clusters. Clonality is defined as  $1 - \text{normalized\_Shannon\_entropy}$ .

(c) IgA1 clonality was associated with poor prognosis, whereas IgG1 clonality, IgG1 and IgA1 expression level and fraction were not. Hazard ratios (hr) and p-values were computed by Cox proportional hazards regression corrected by patient age.

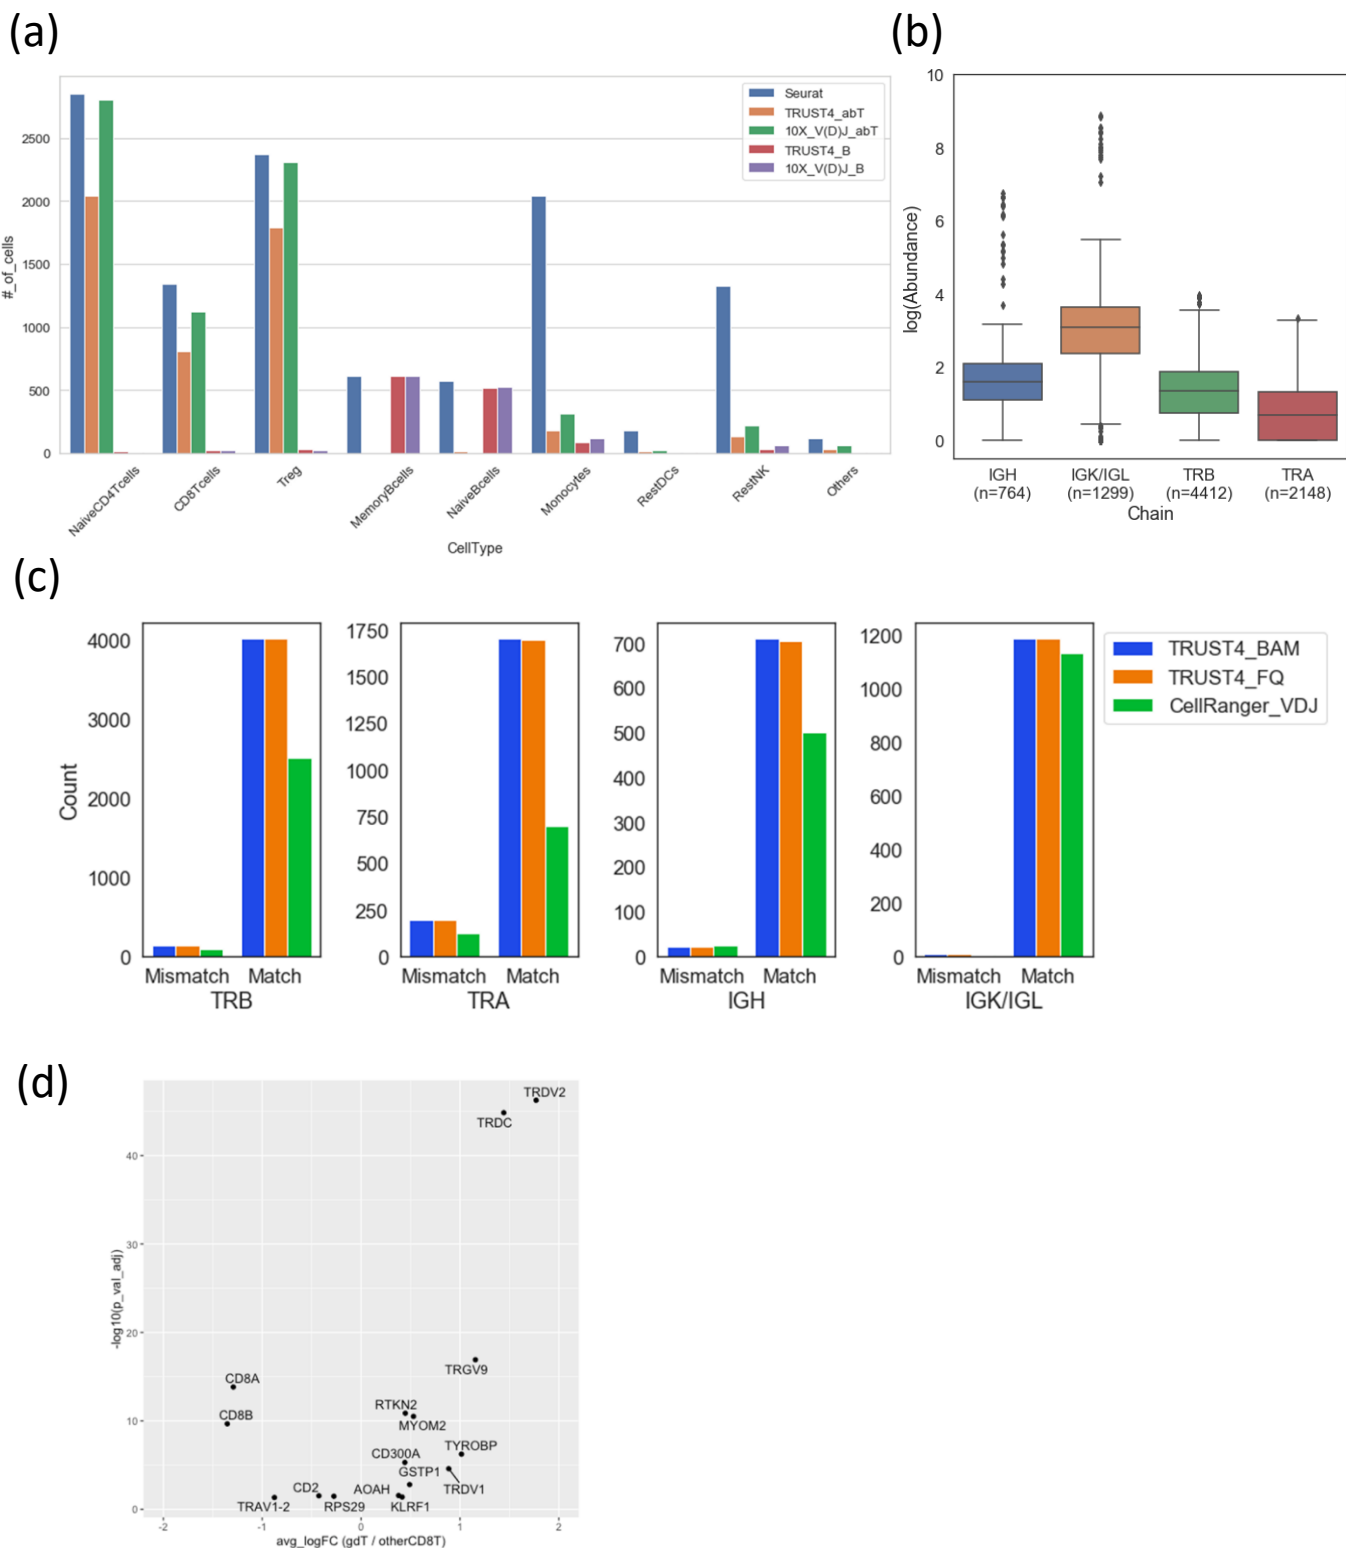

Supplementary Figure 5. Evaluation on 10X Genomics 5' scRNA-seq of PBMC

(a) TRUST4 and 10X V(D)J immune repertoire calls on Seurat annotated 10X scRNA-seq of PBMC.

(b) Significantly higher read coverage of BCRs than TCRs in 10X scRNA-seq. Abundance is the number of reads found by TRUST4 that supports the CDR3. p-values: IGH vs TRB:  $3e-17$ ; IGK/IGL vs TRA:  $<1e-30$  (two-sided Wilcoxon rank-sum test).

(c) Comparison of CellRanger\_VDJ, TRUST4 with BAM and FASTQ input using 10X V(D)J data as gold standard. CellRanger\_VDJ and TRUST4\_FQ both took raw FASTQ data as input. TRUST4 completed in 1.5 hours with 5.5GB memory usage, while CellRanger\_VDJ spent 19 hours and 13GB memory. TRUST4 was tested with 8 threads and CellRanger\_VDJ was given 8 cores.

(d) Higher expression of TRDV, TRGV and TRDC and lower expression of CD8A and CD8B in the 83 gd T cells compared to all other CD8 T cells. The results were based on Seurat's function "FindMarkers".

(a)

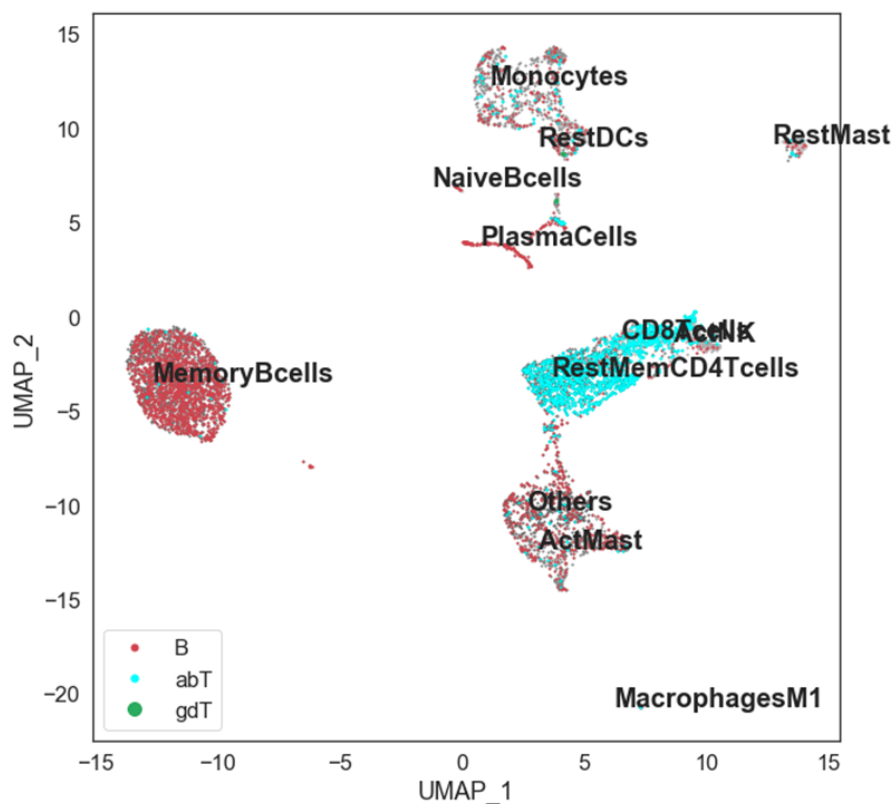

(b)

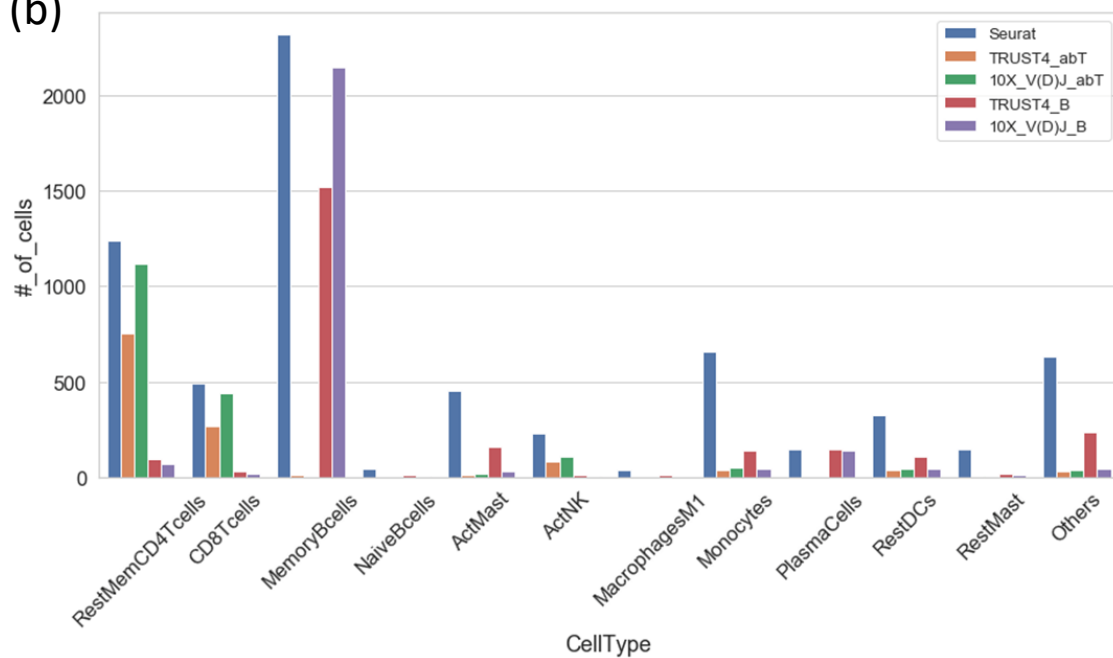

Supplementary Figure 6. TRUST4 immune repertoire calls agree with 10X V(D)J and Seurat annotation on NSCLC 10X scRNA-seq data

(a) UMAP of the cells colored by TRUST4 called CDR3 types

(b) Comparison between TRUST4 and 10X V(D)J immune repertoire calls on Seurat annotation

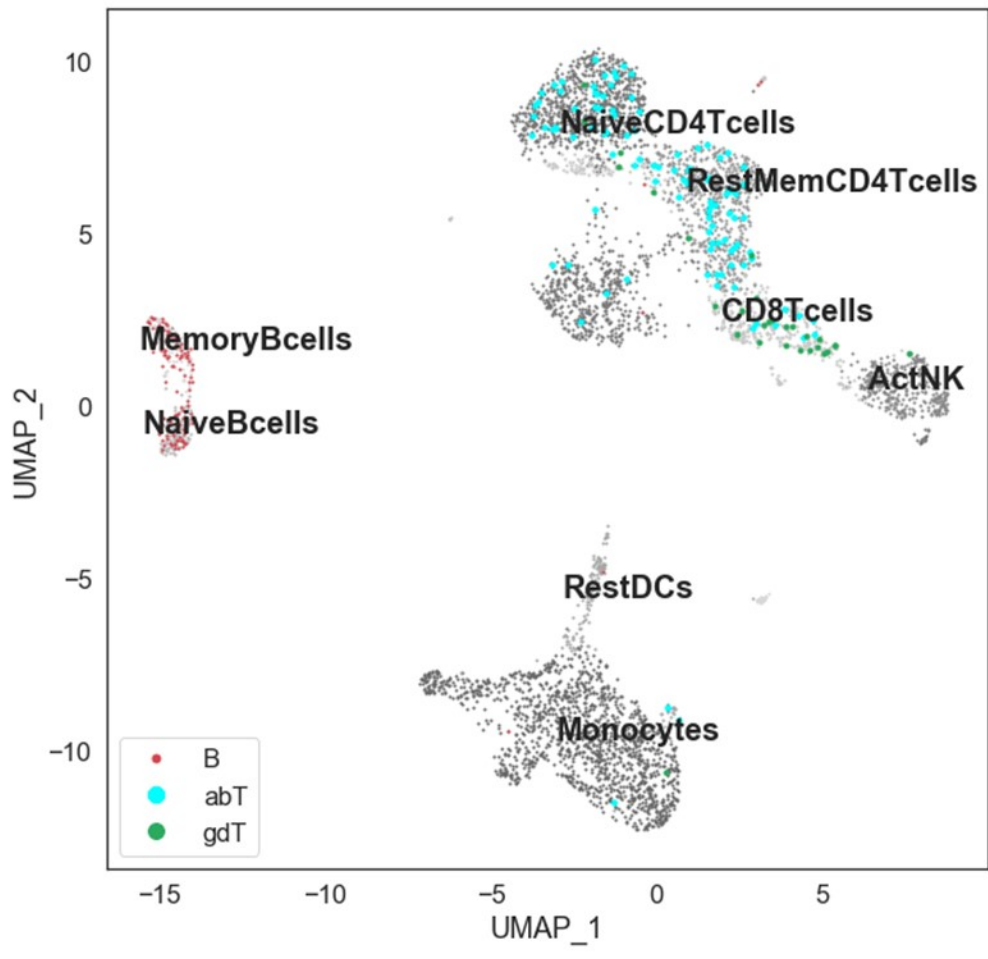

Supplementary Figure 7. TRUST4 calls fewer TCRs and BCRs from 3' 10X scRNA-seq data of PBMC. Due to the low recall number, the circle size of abT and gdT called by TRUST4 was enlarged.
